# Supplementary material for: Simultaneous quantification of protein-DNA contacts and transcriptomes in single cells
Source: bioRxiv or medRxiv preprint supplement (doi:10.1101/529388), 2019-01-24

Figure S1

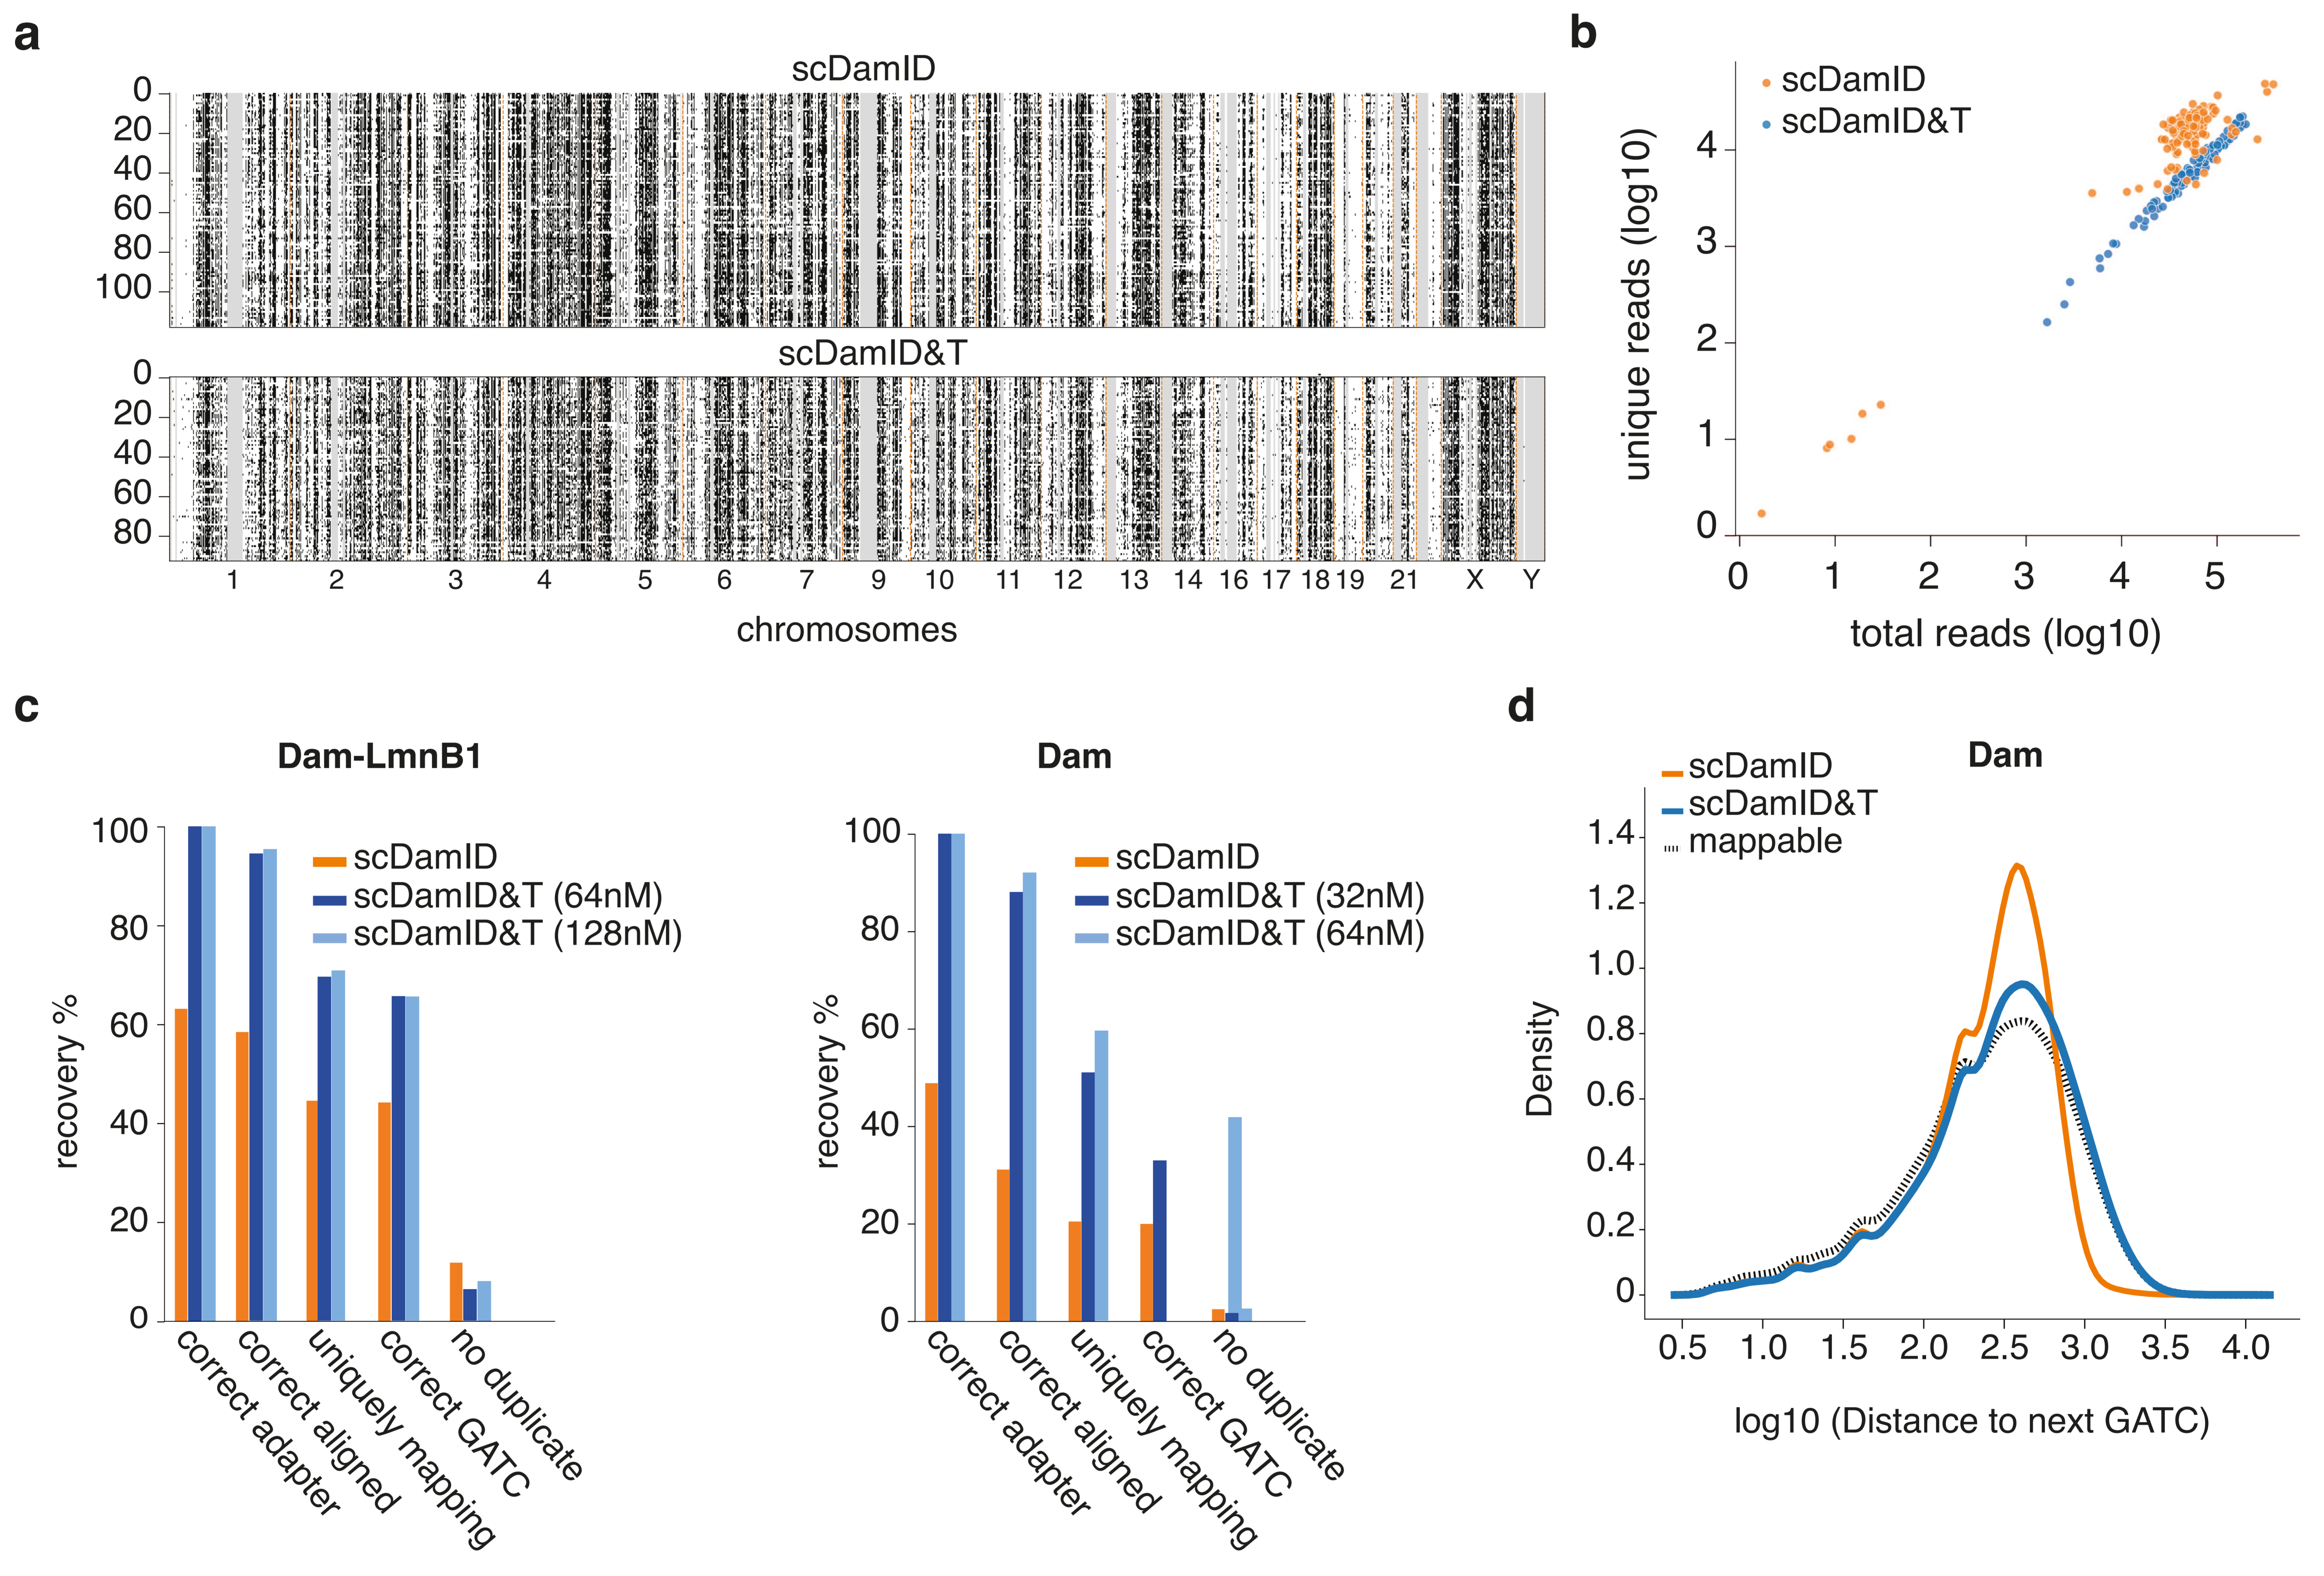

**Figure S2**

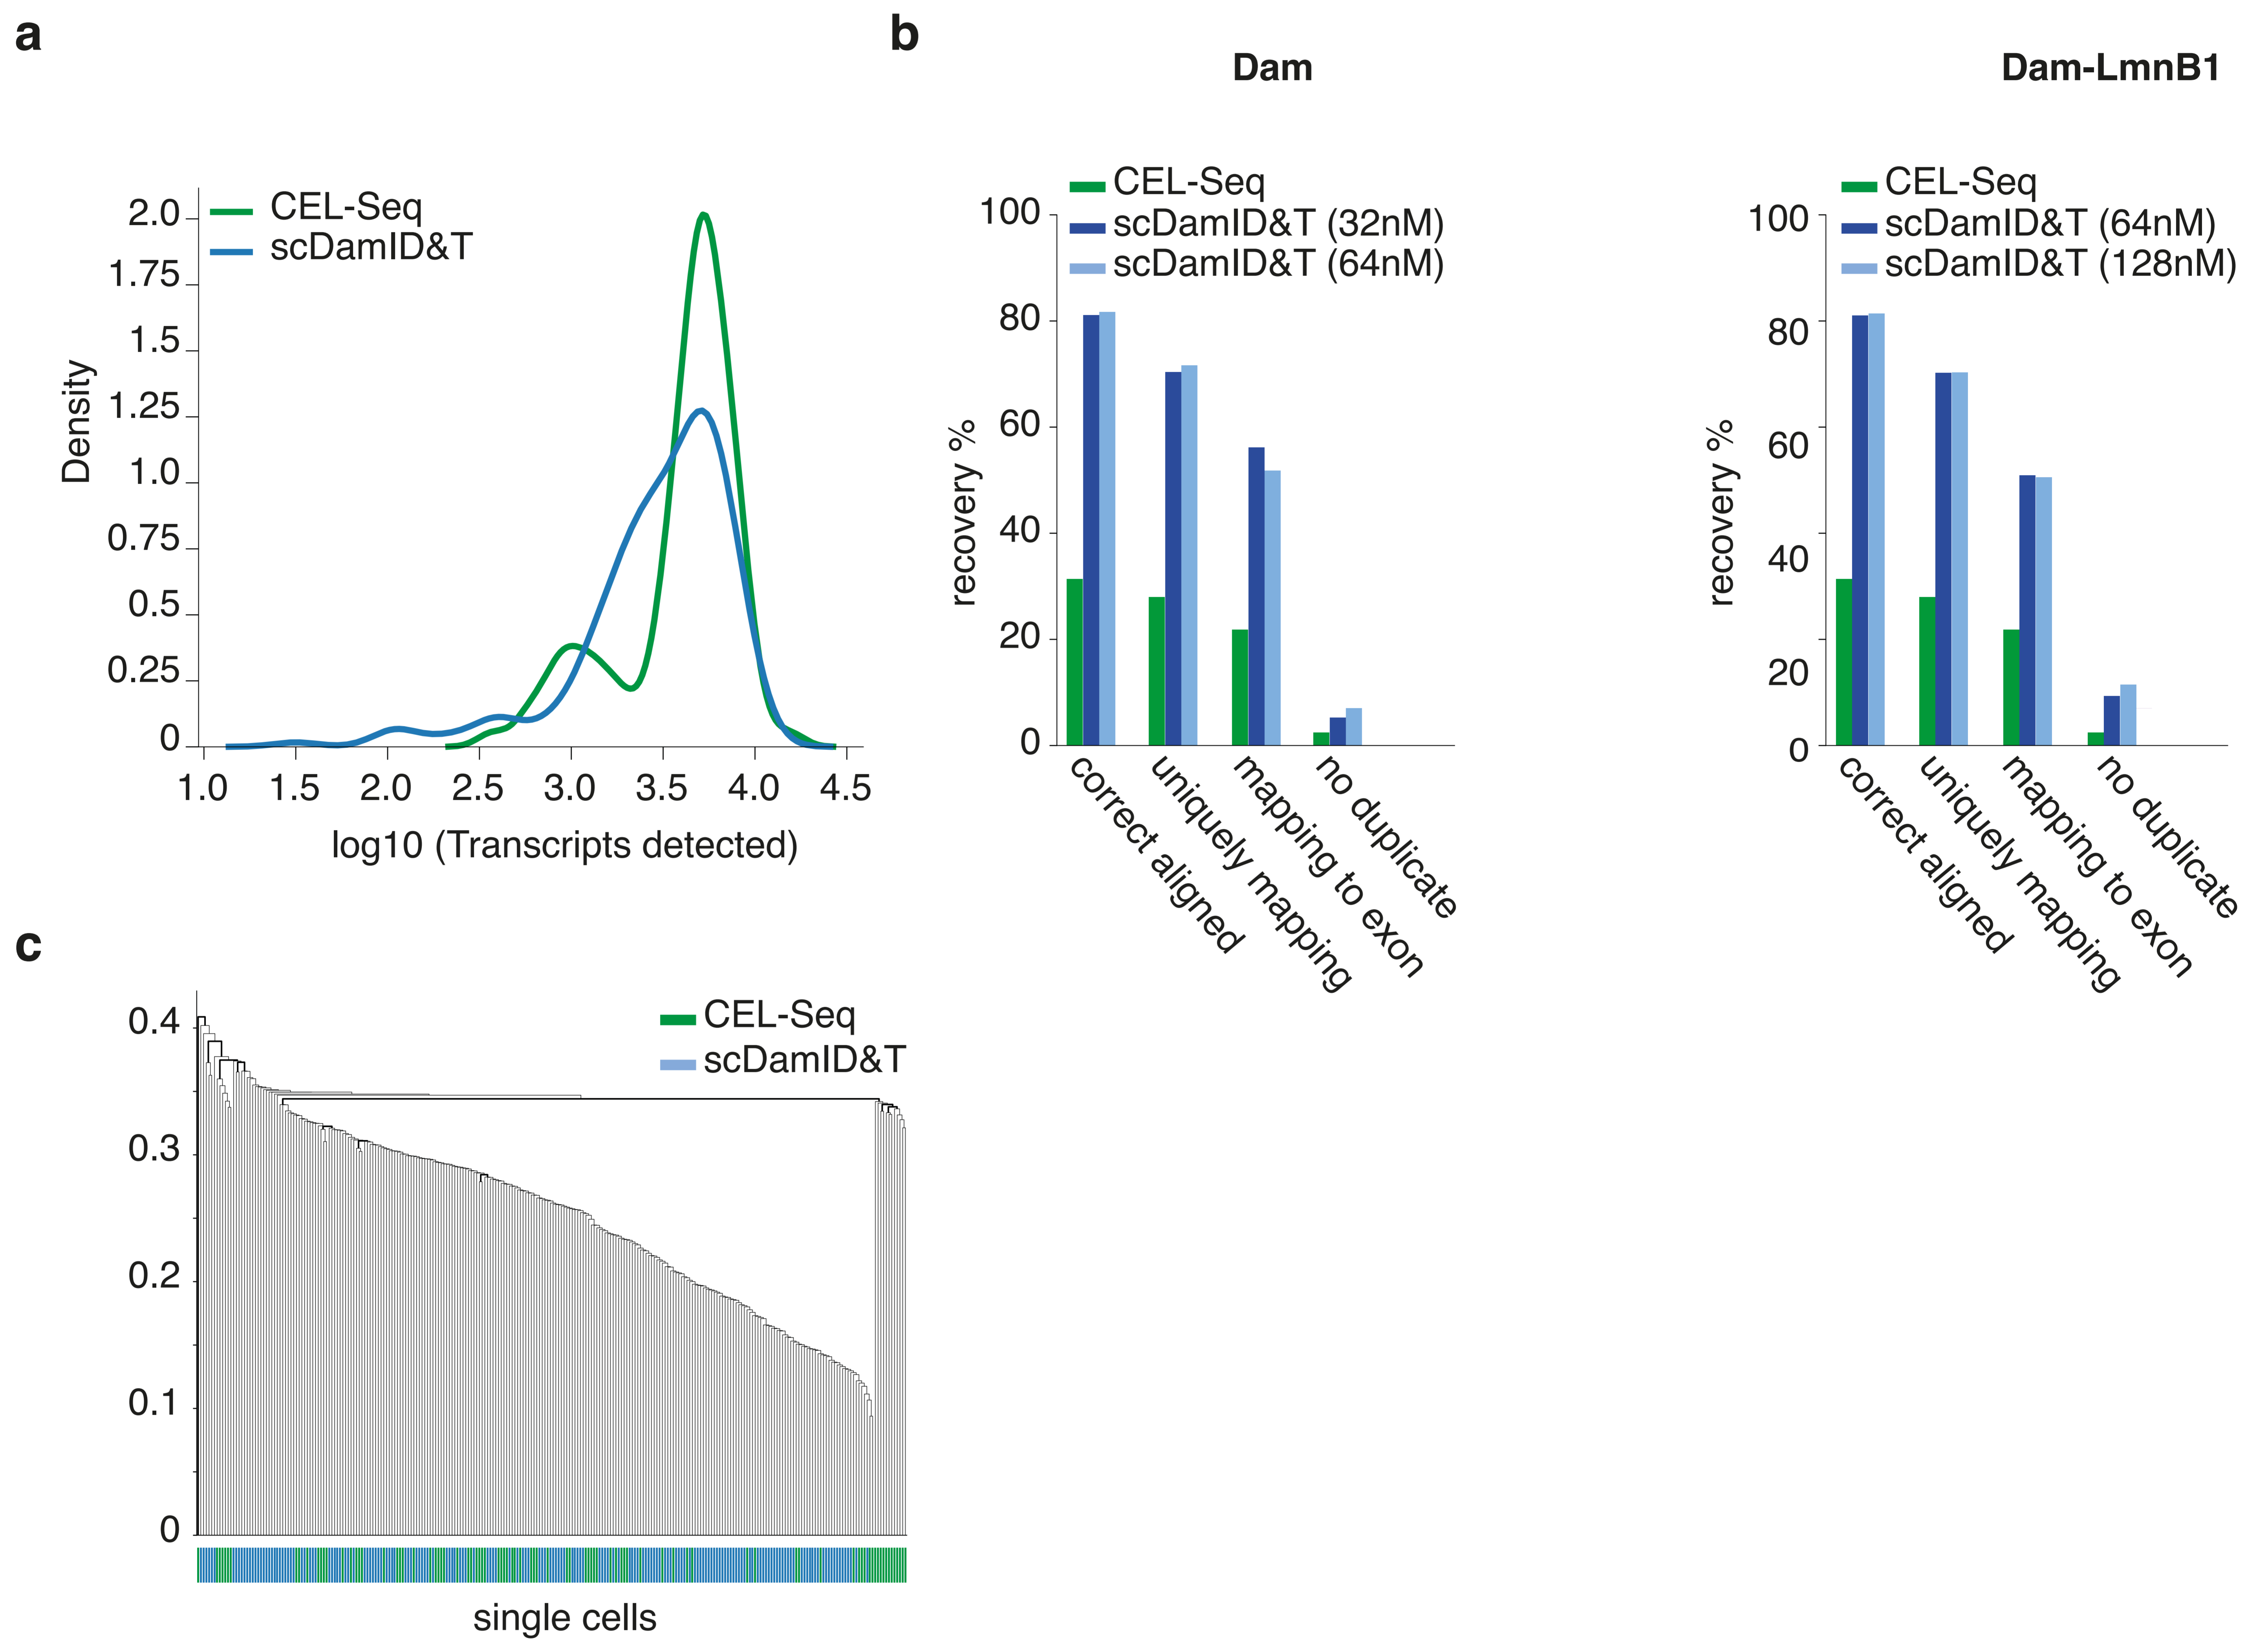

**Figure S3**

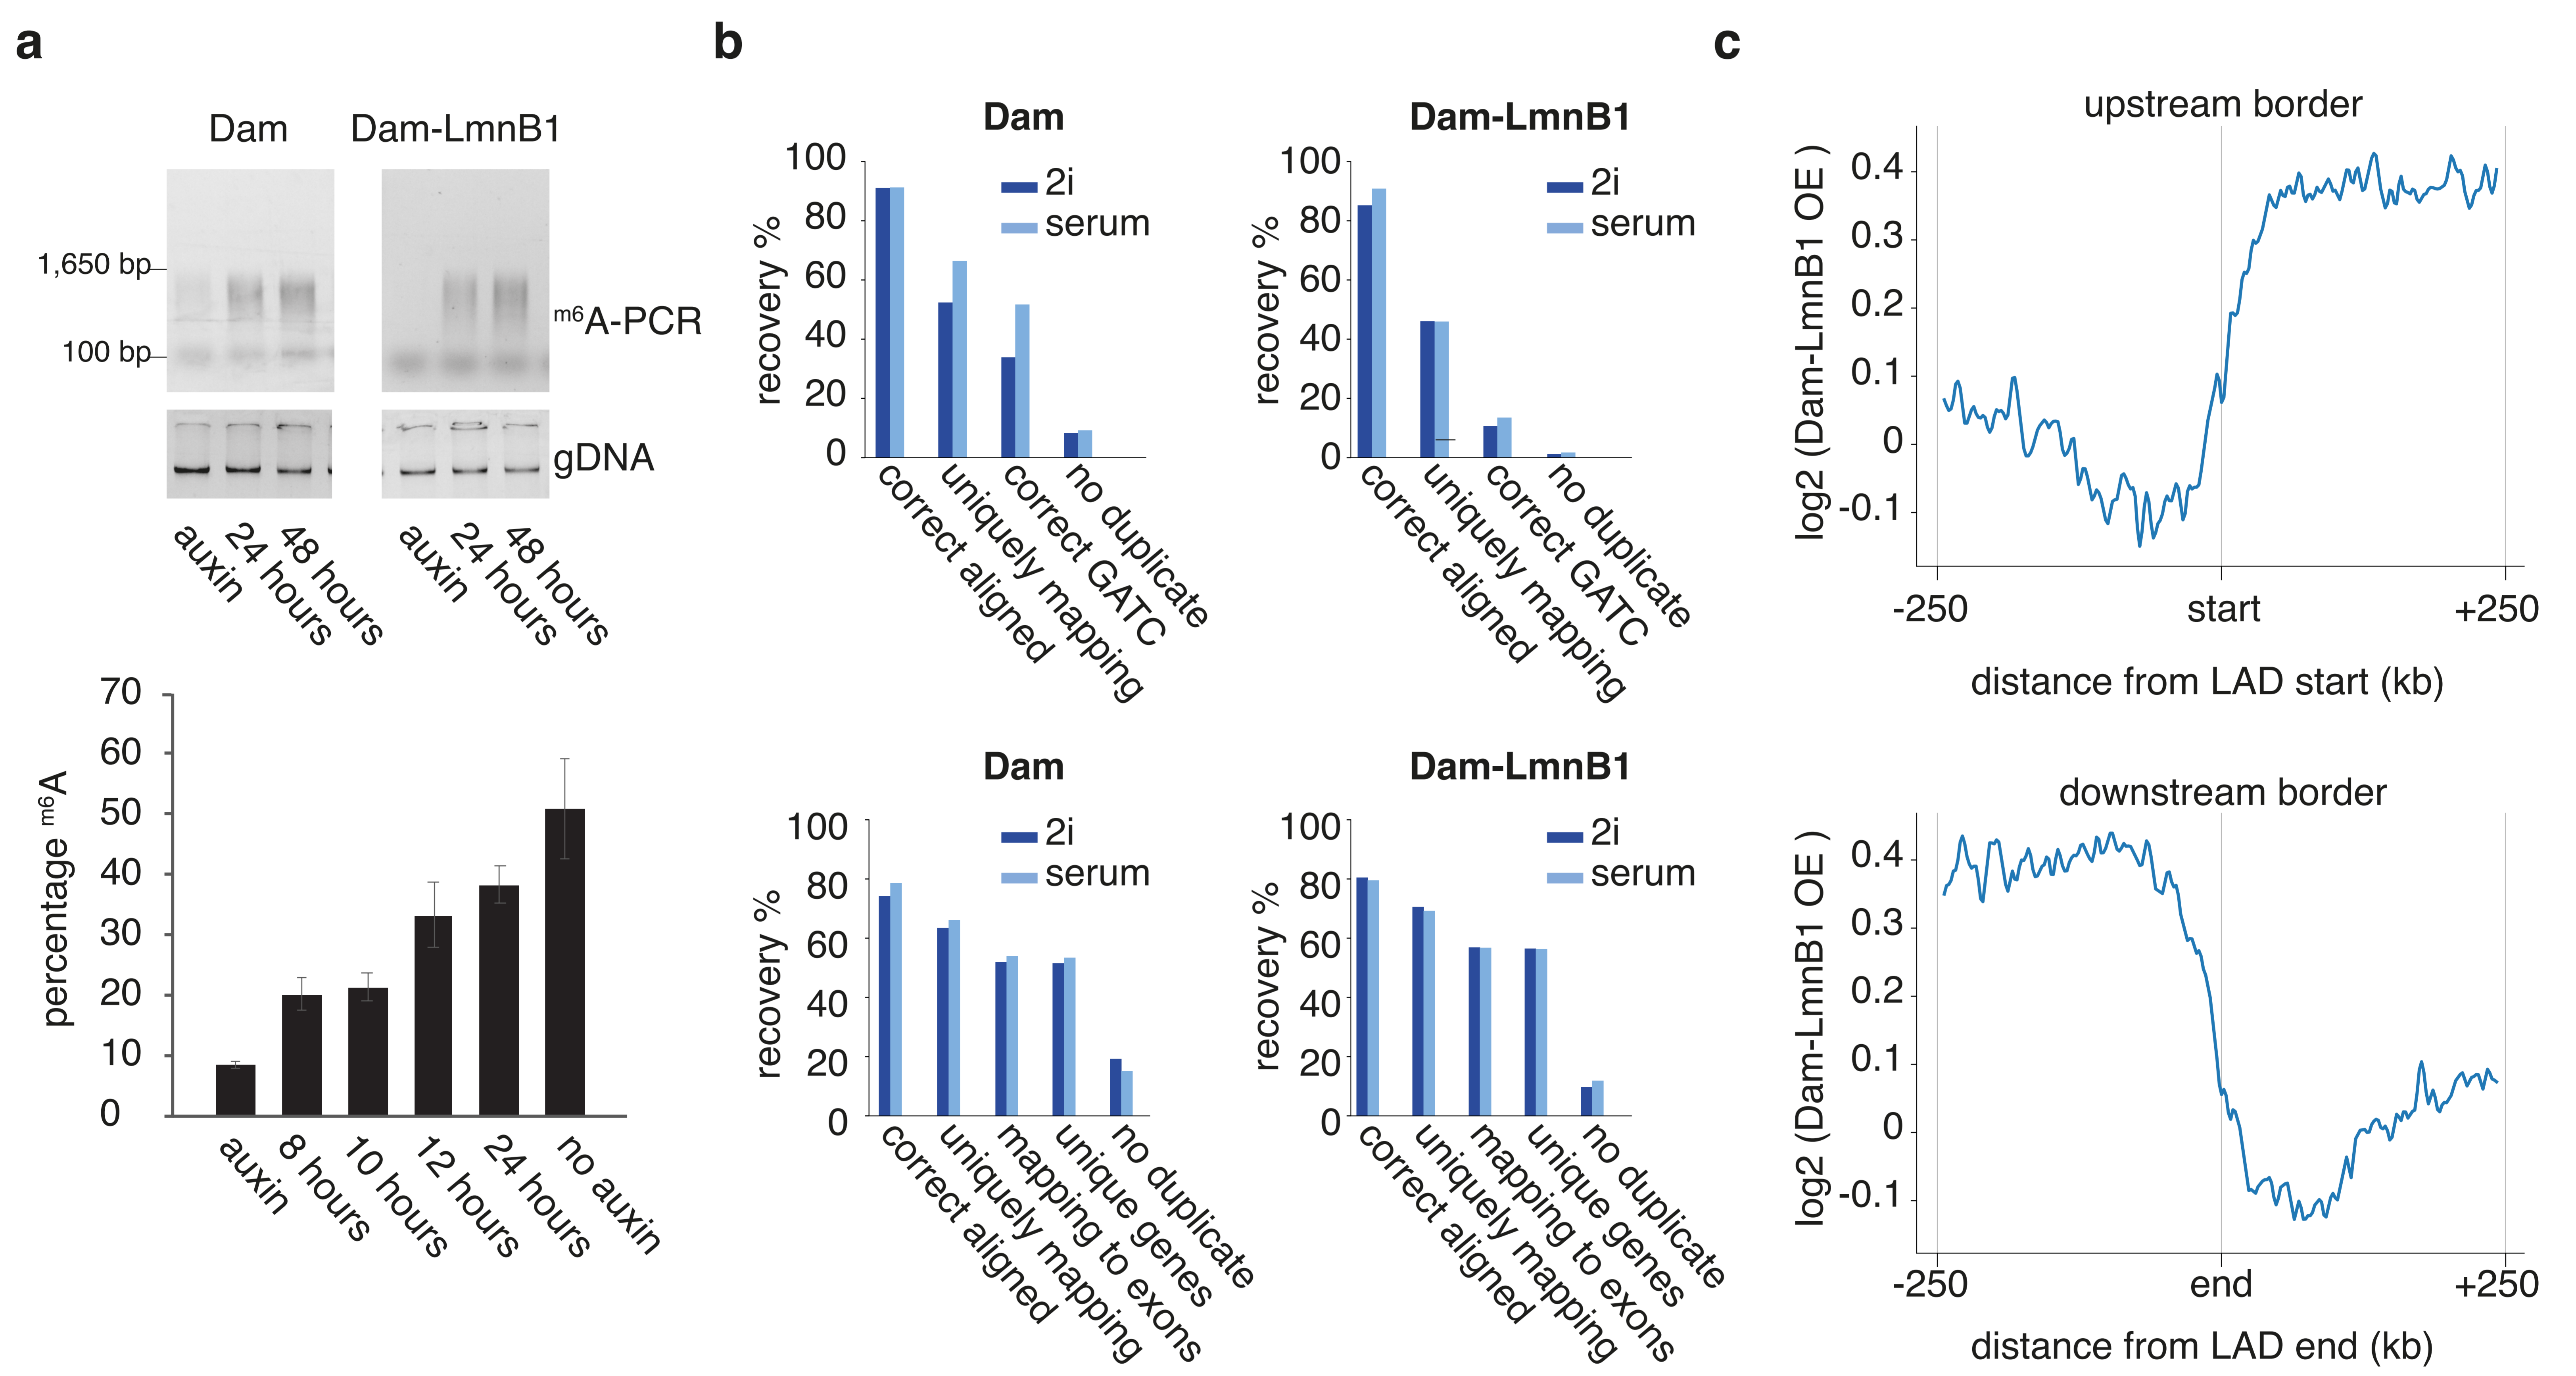

Figure S4

a

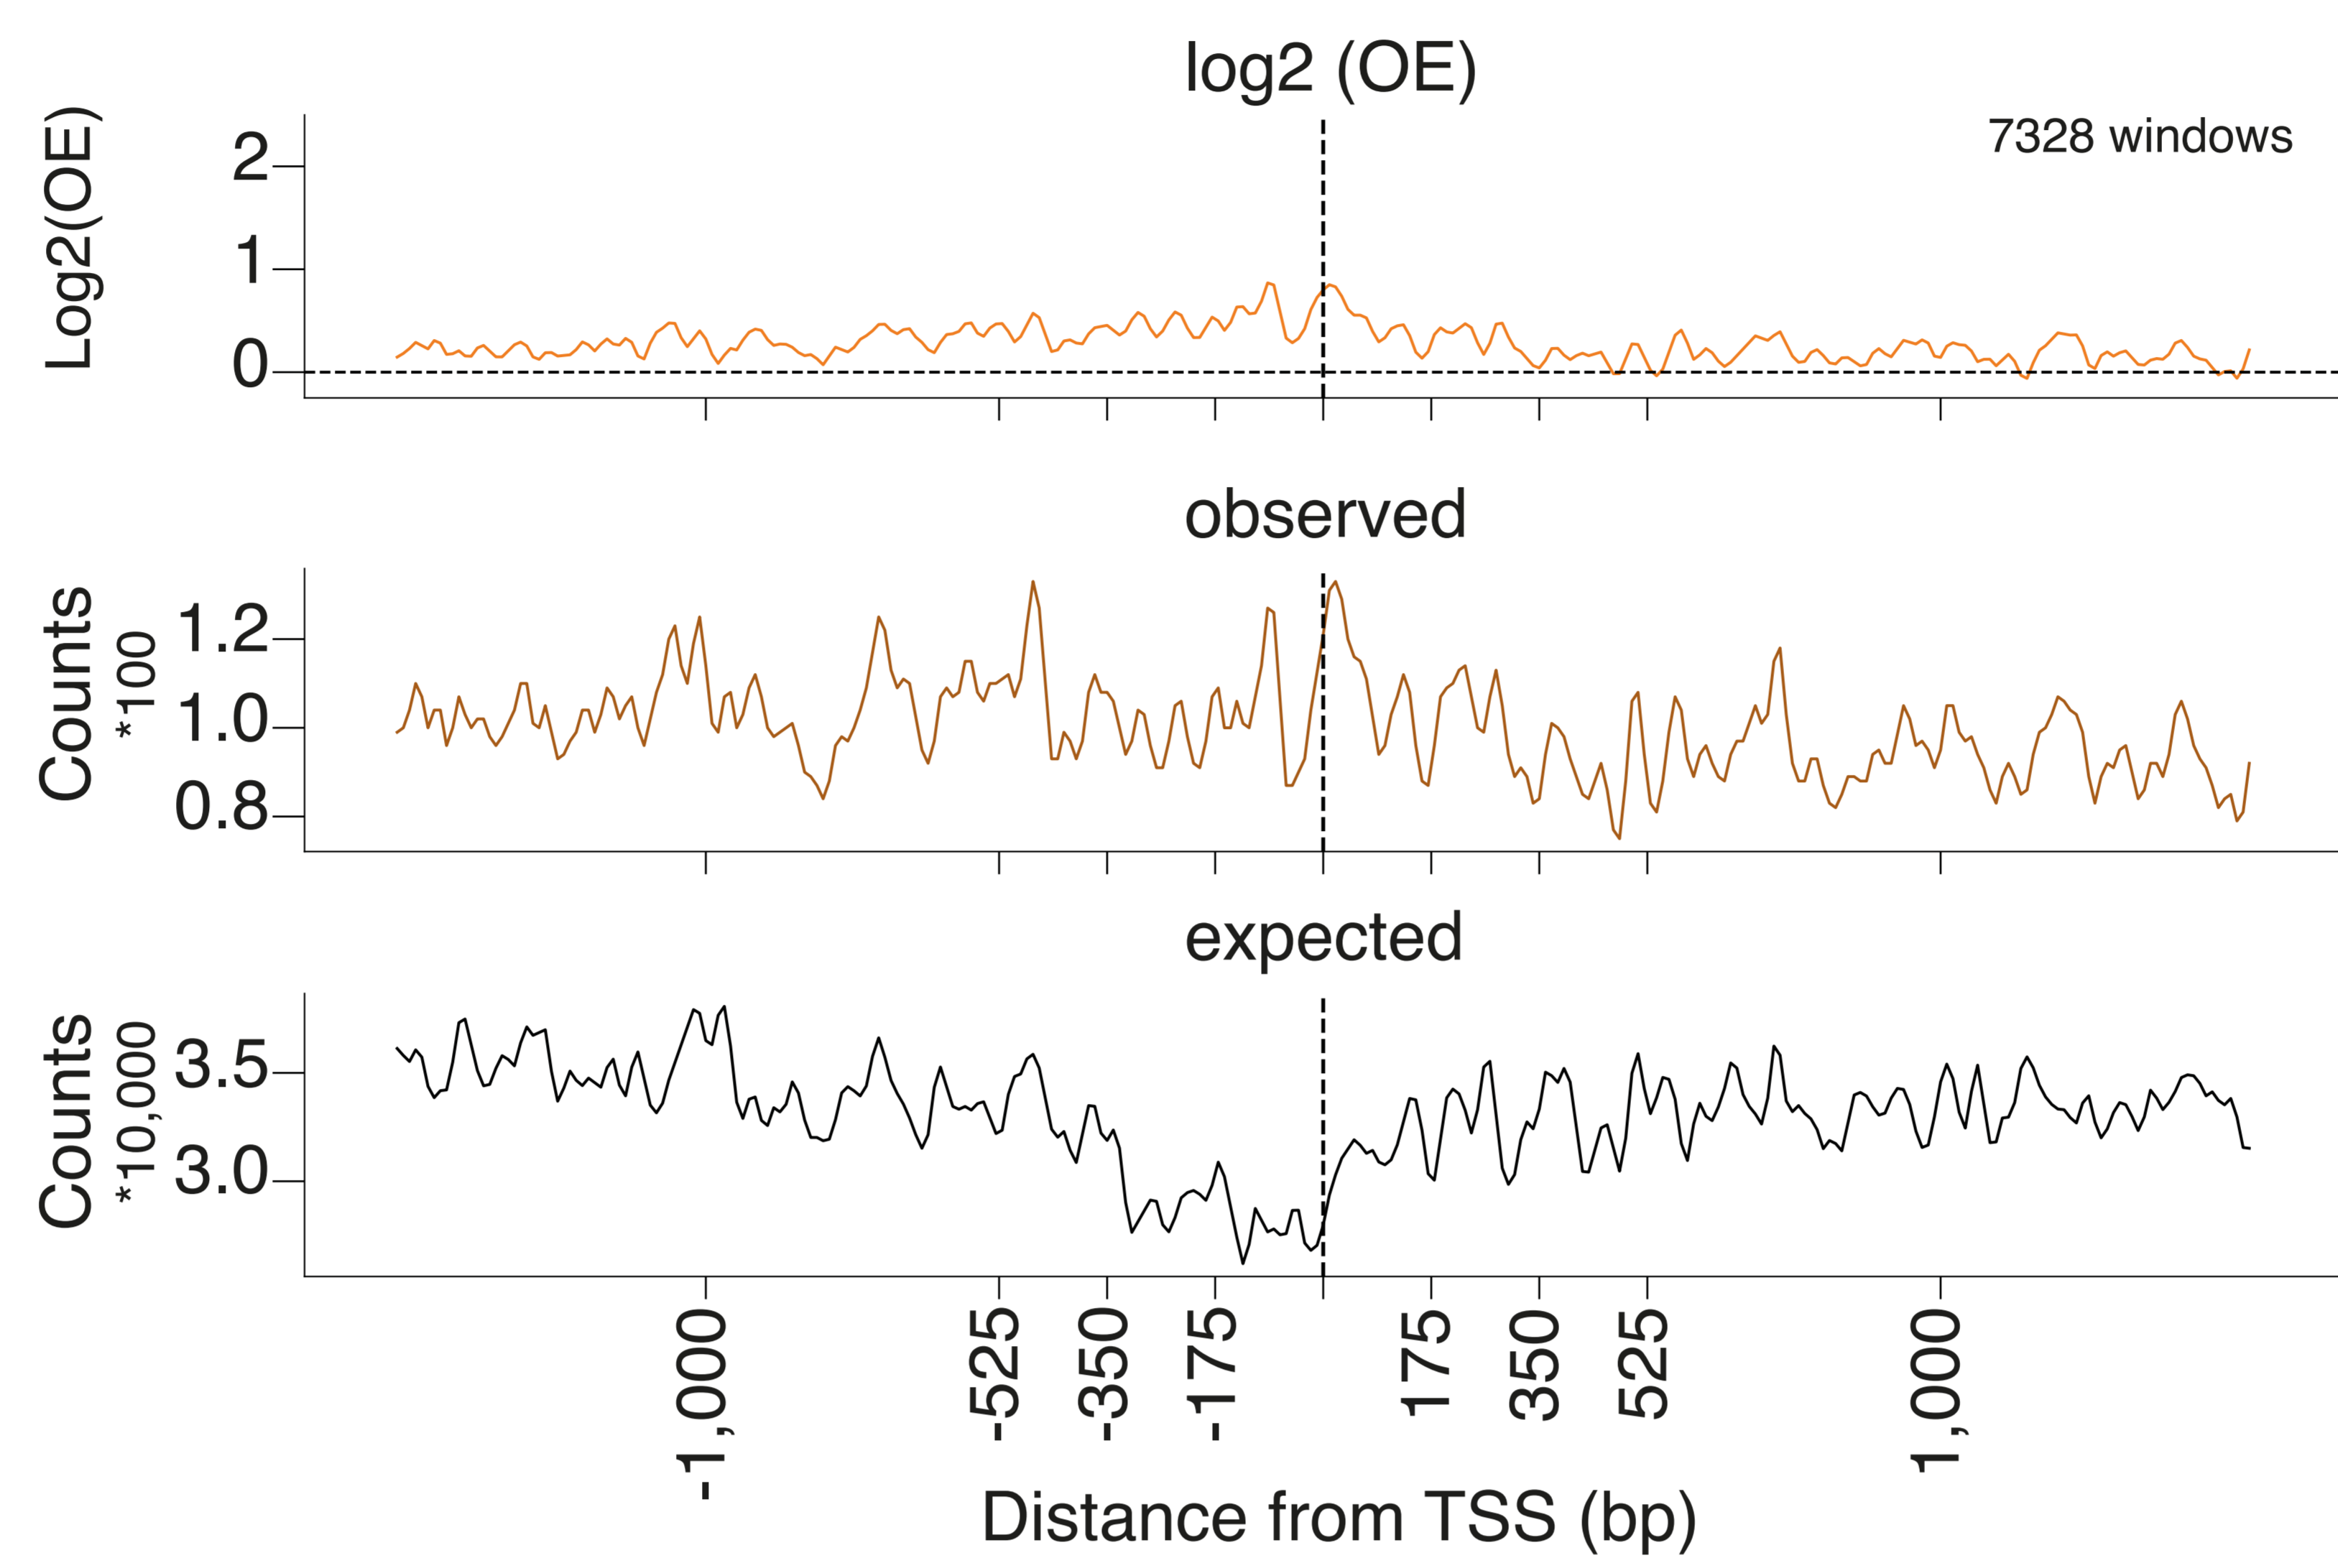

b

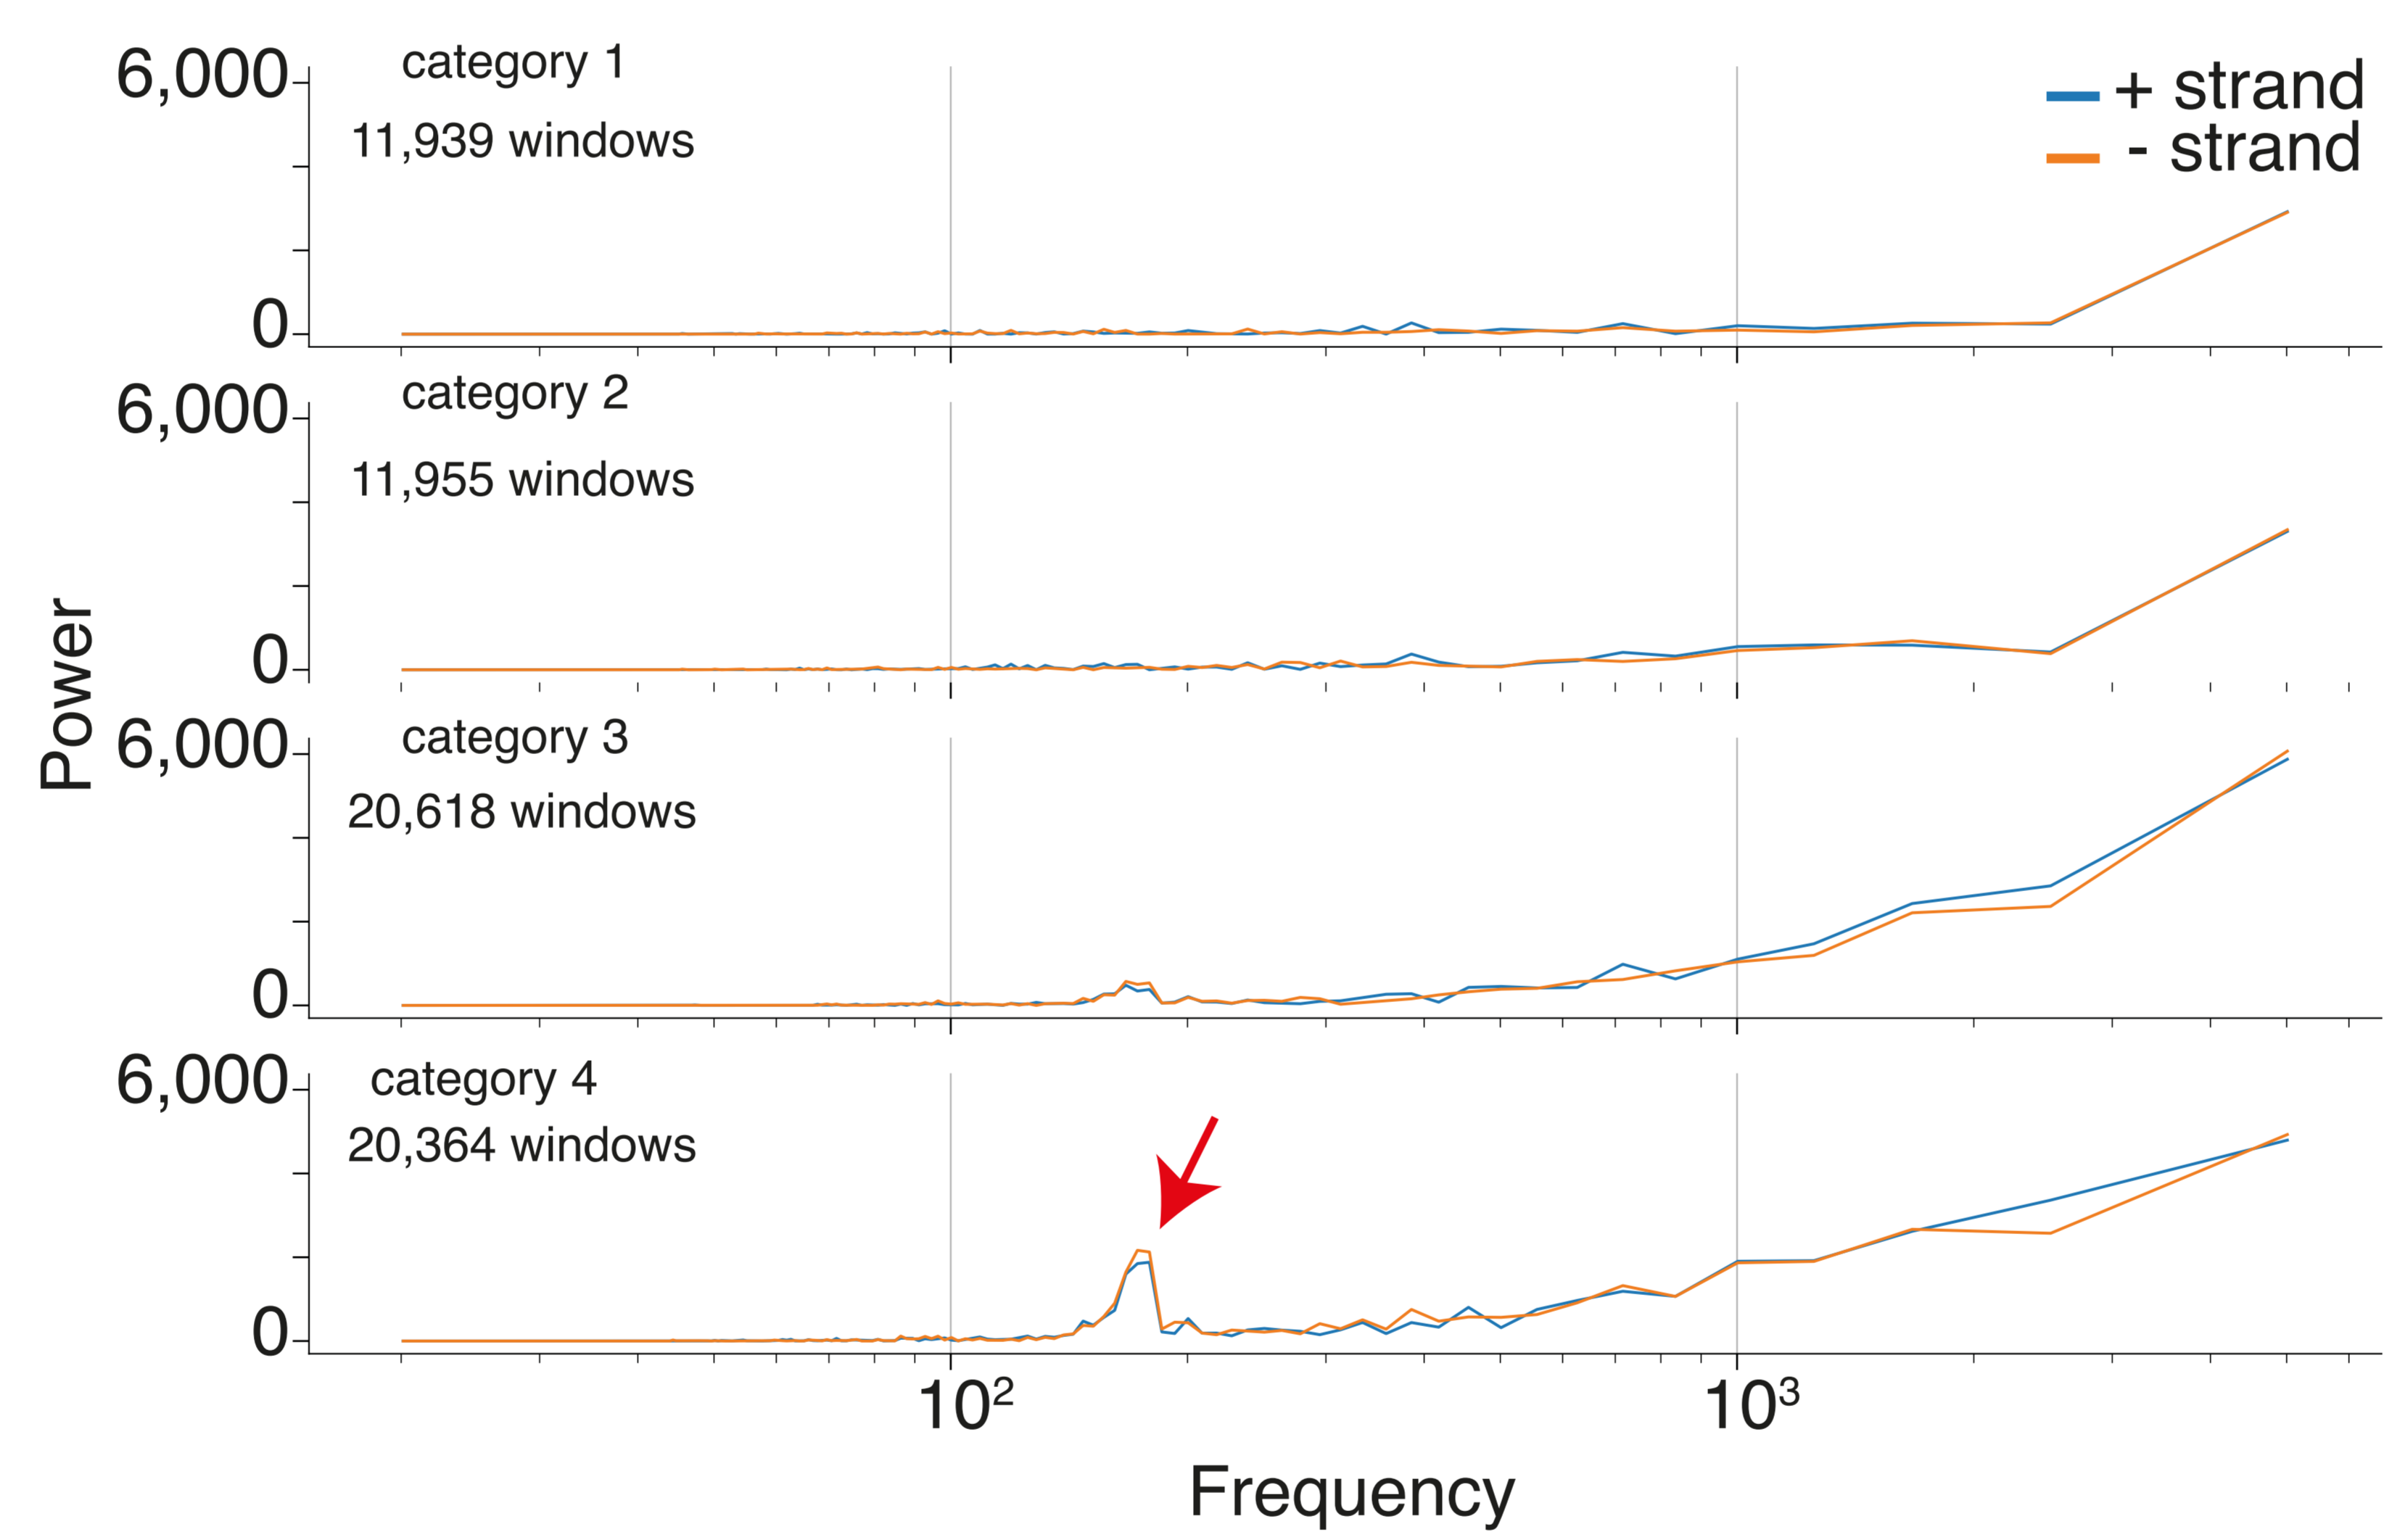

c

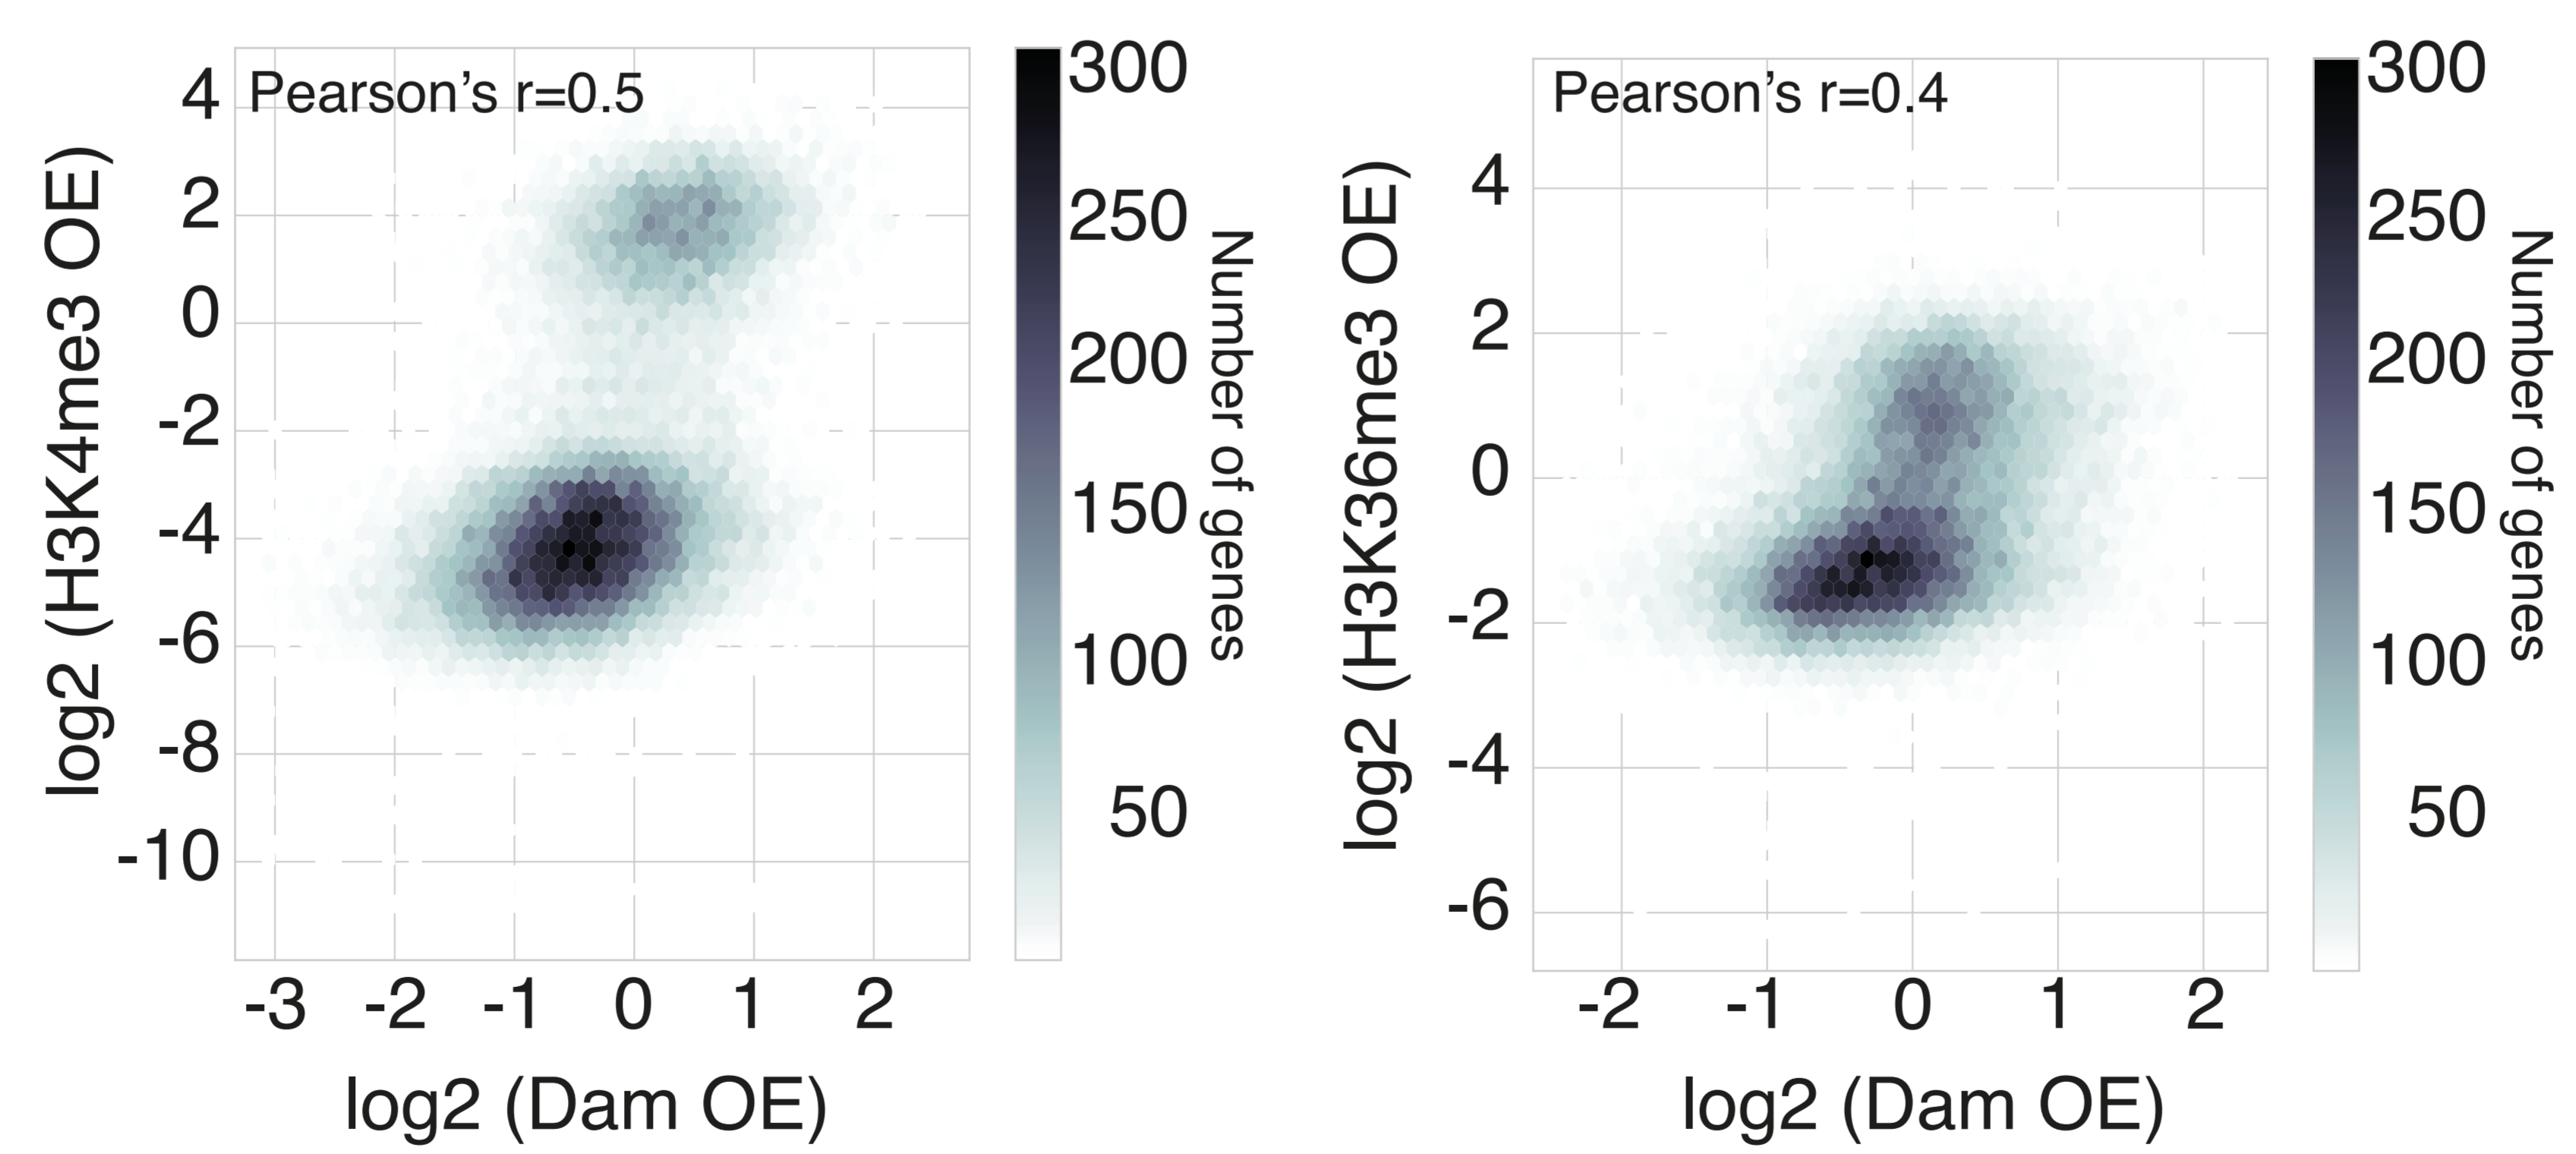

Figure S5

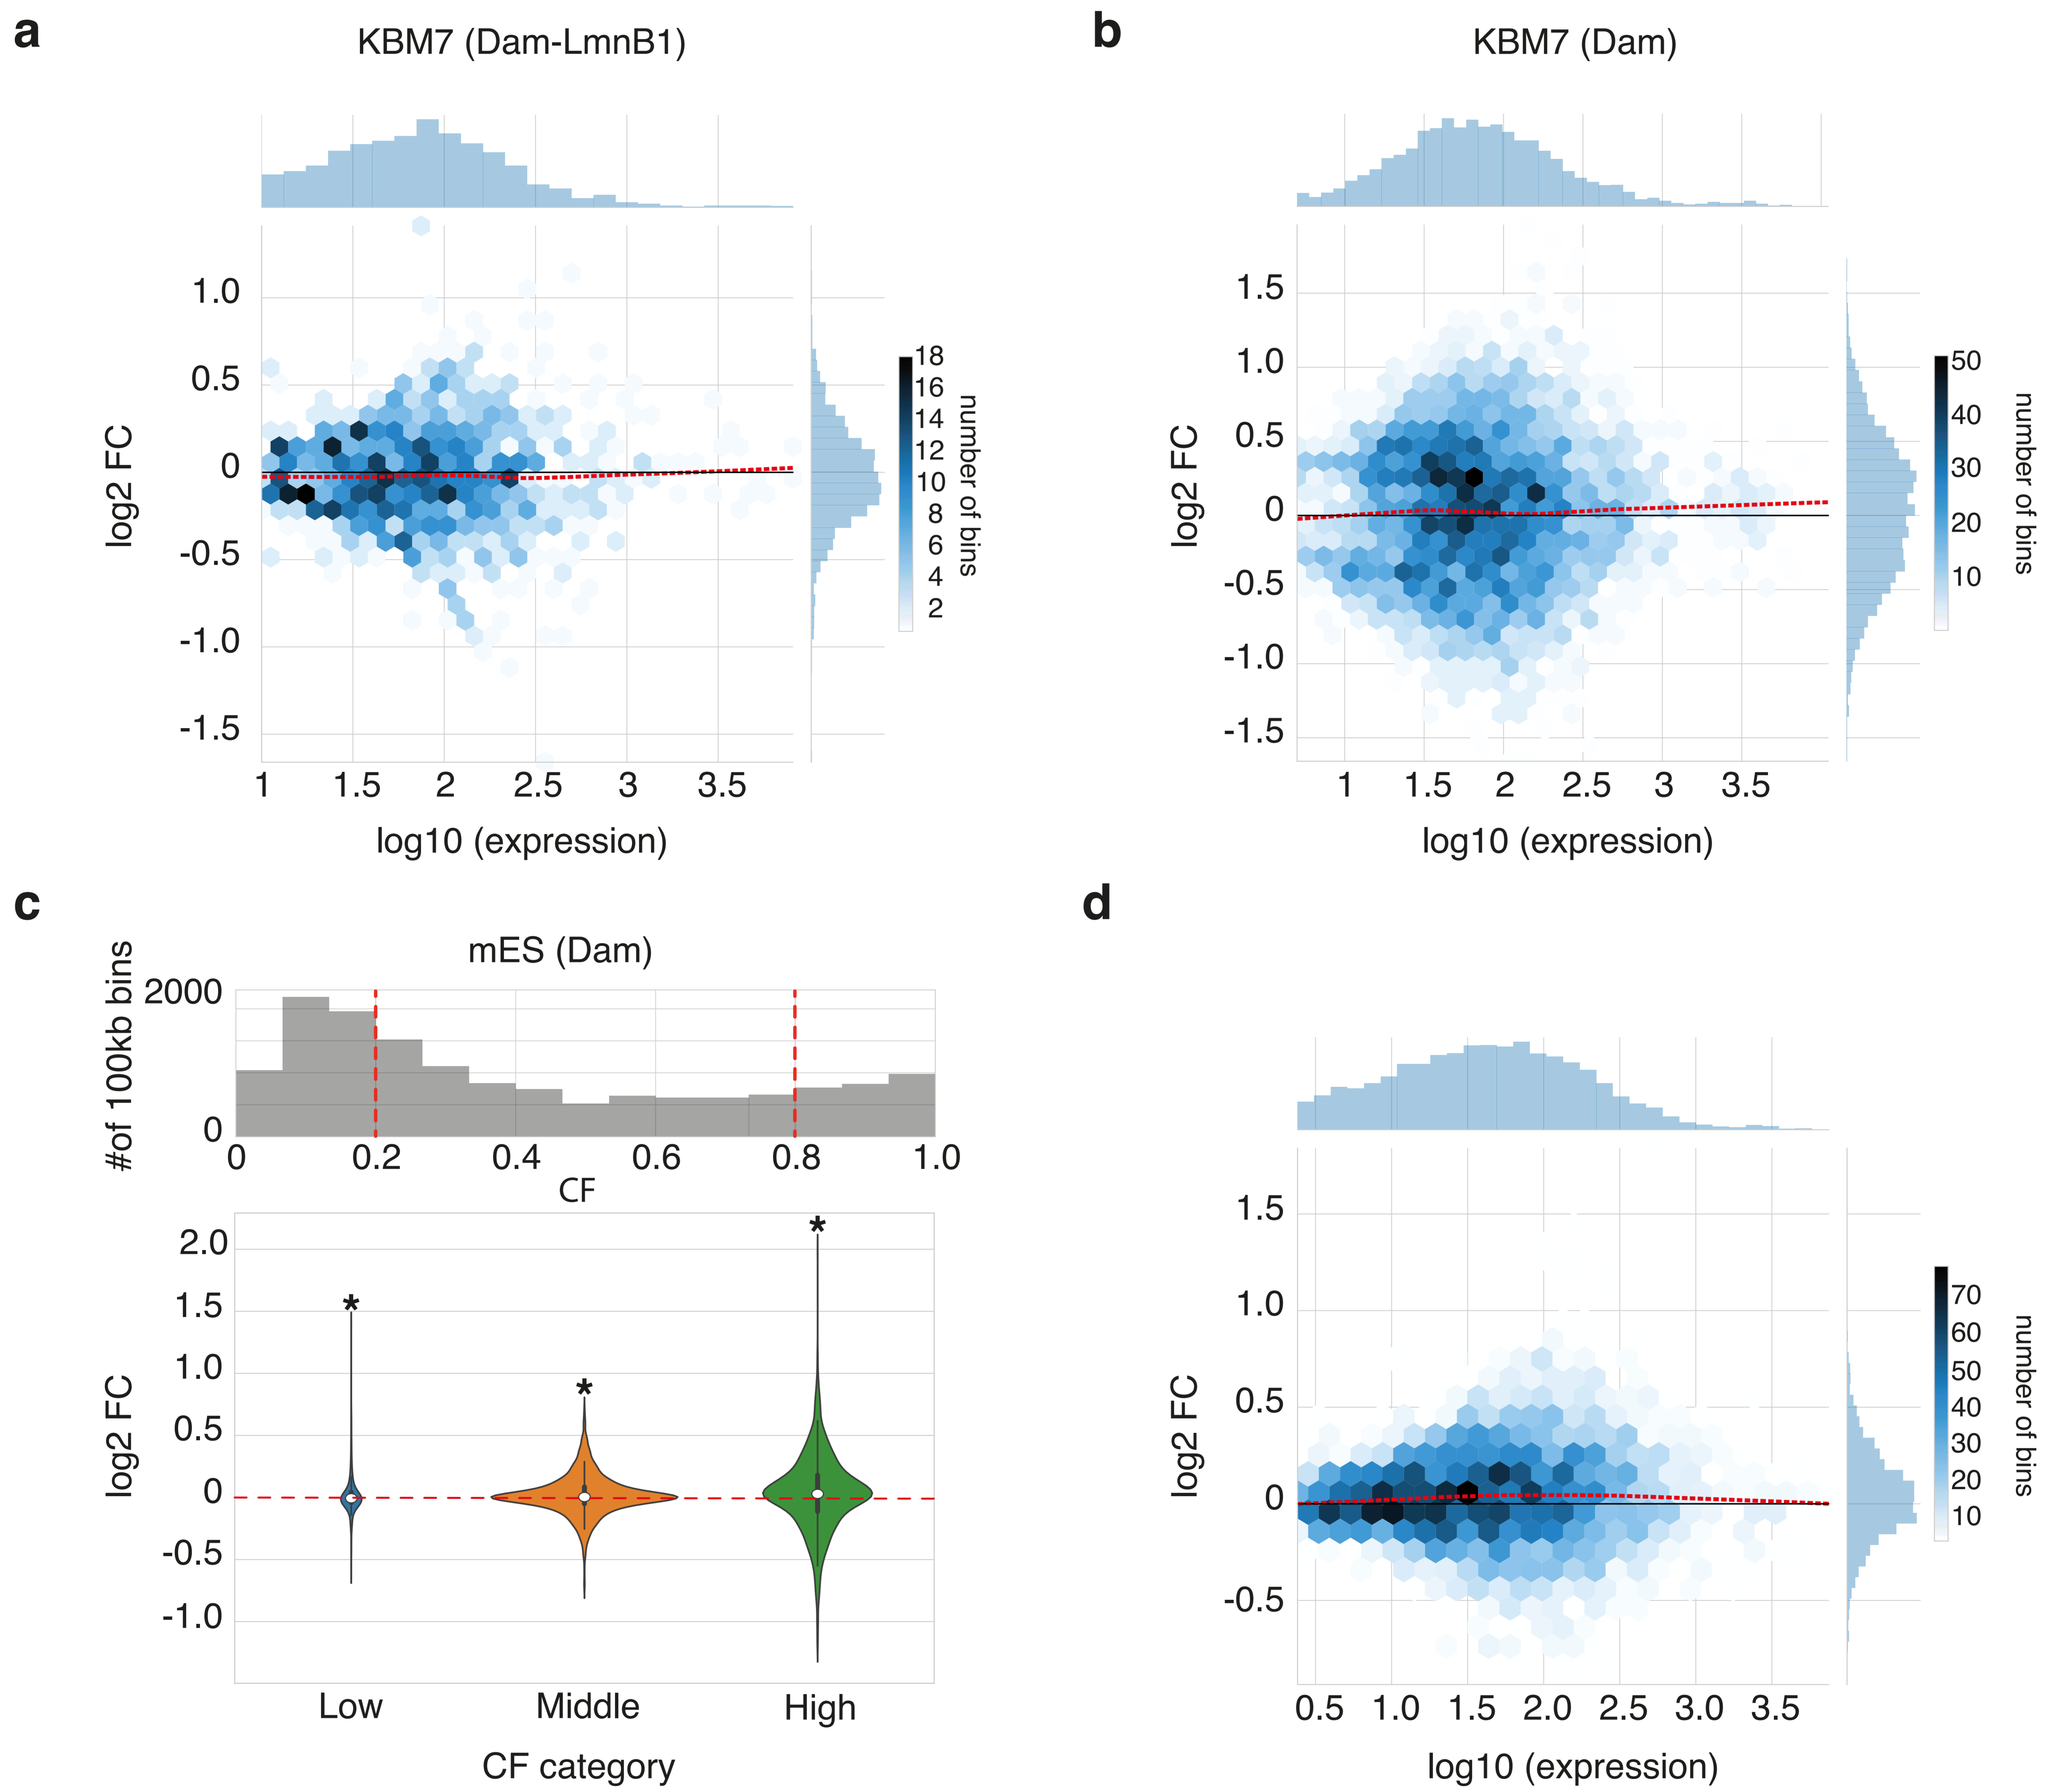

Figure S6

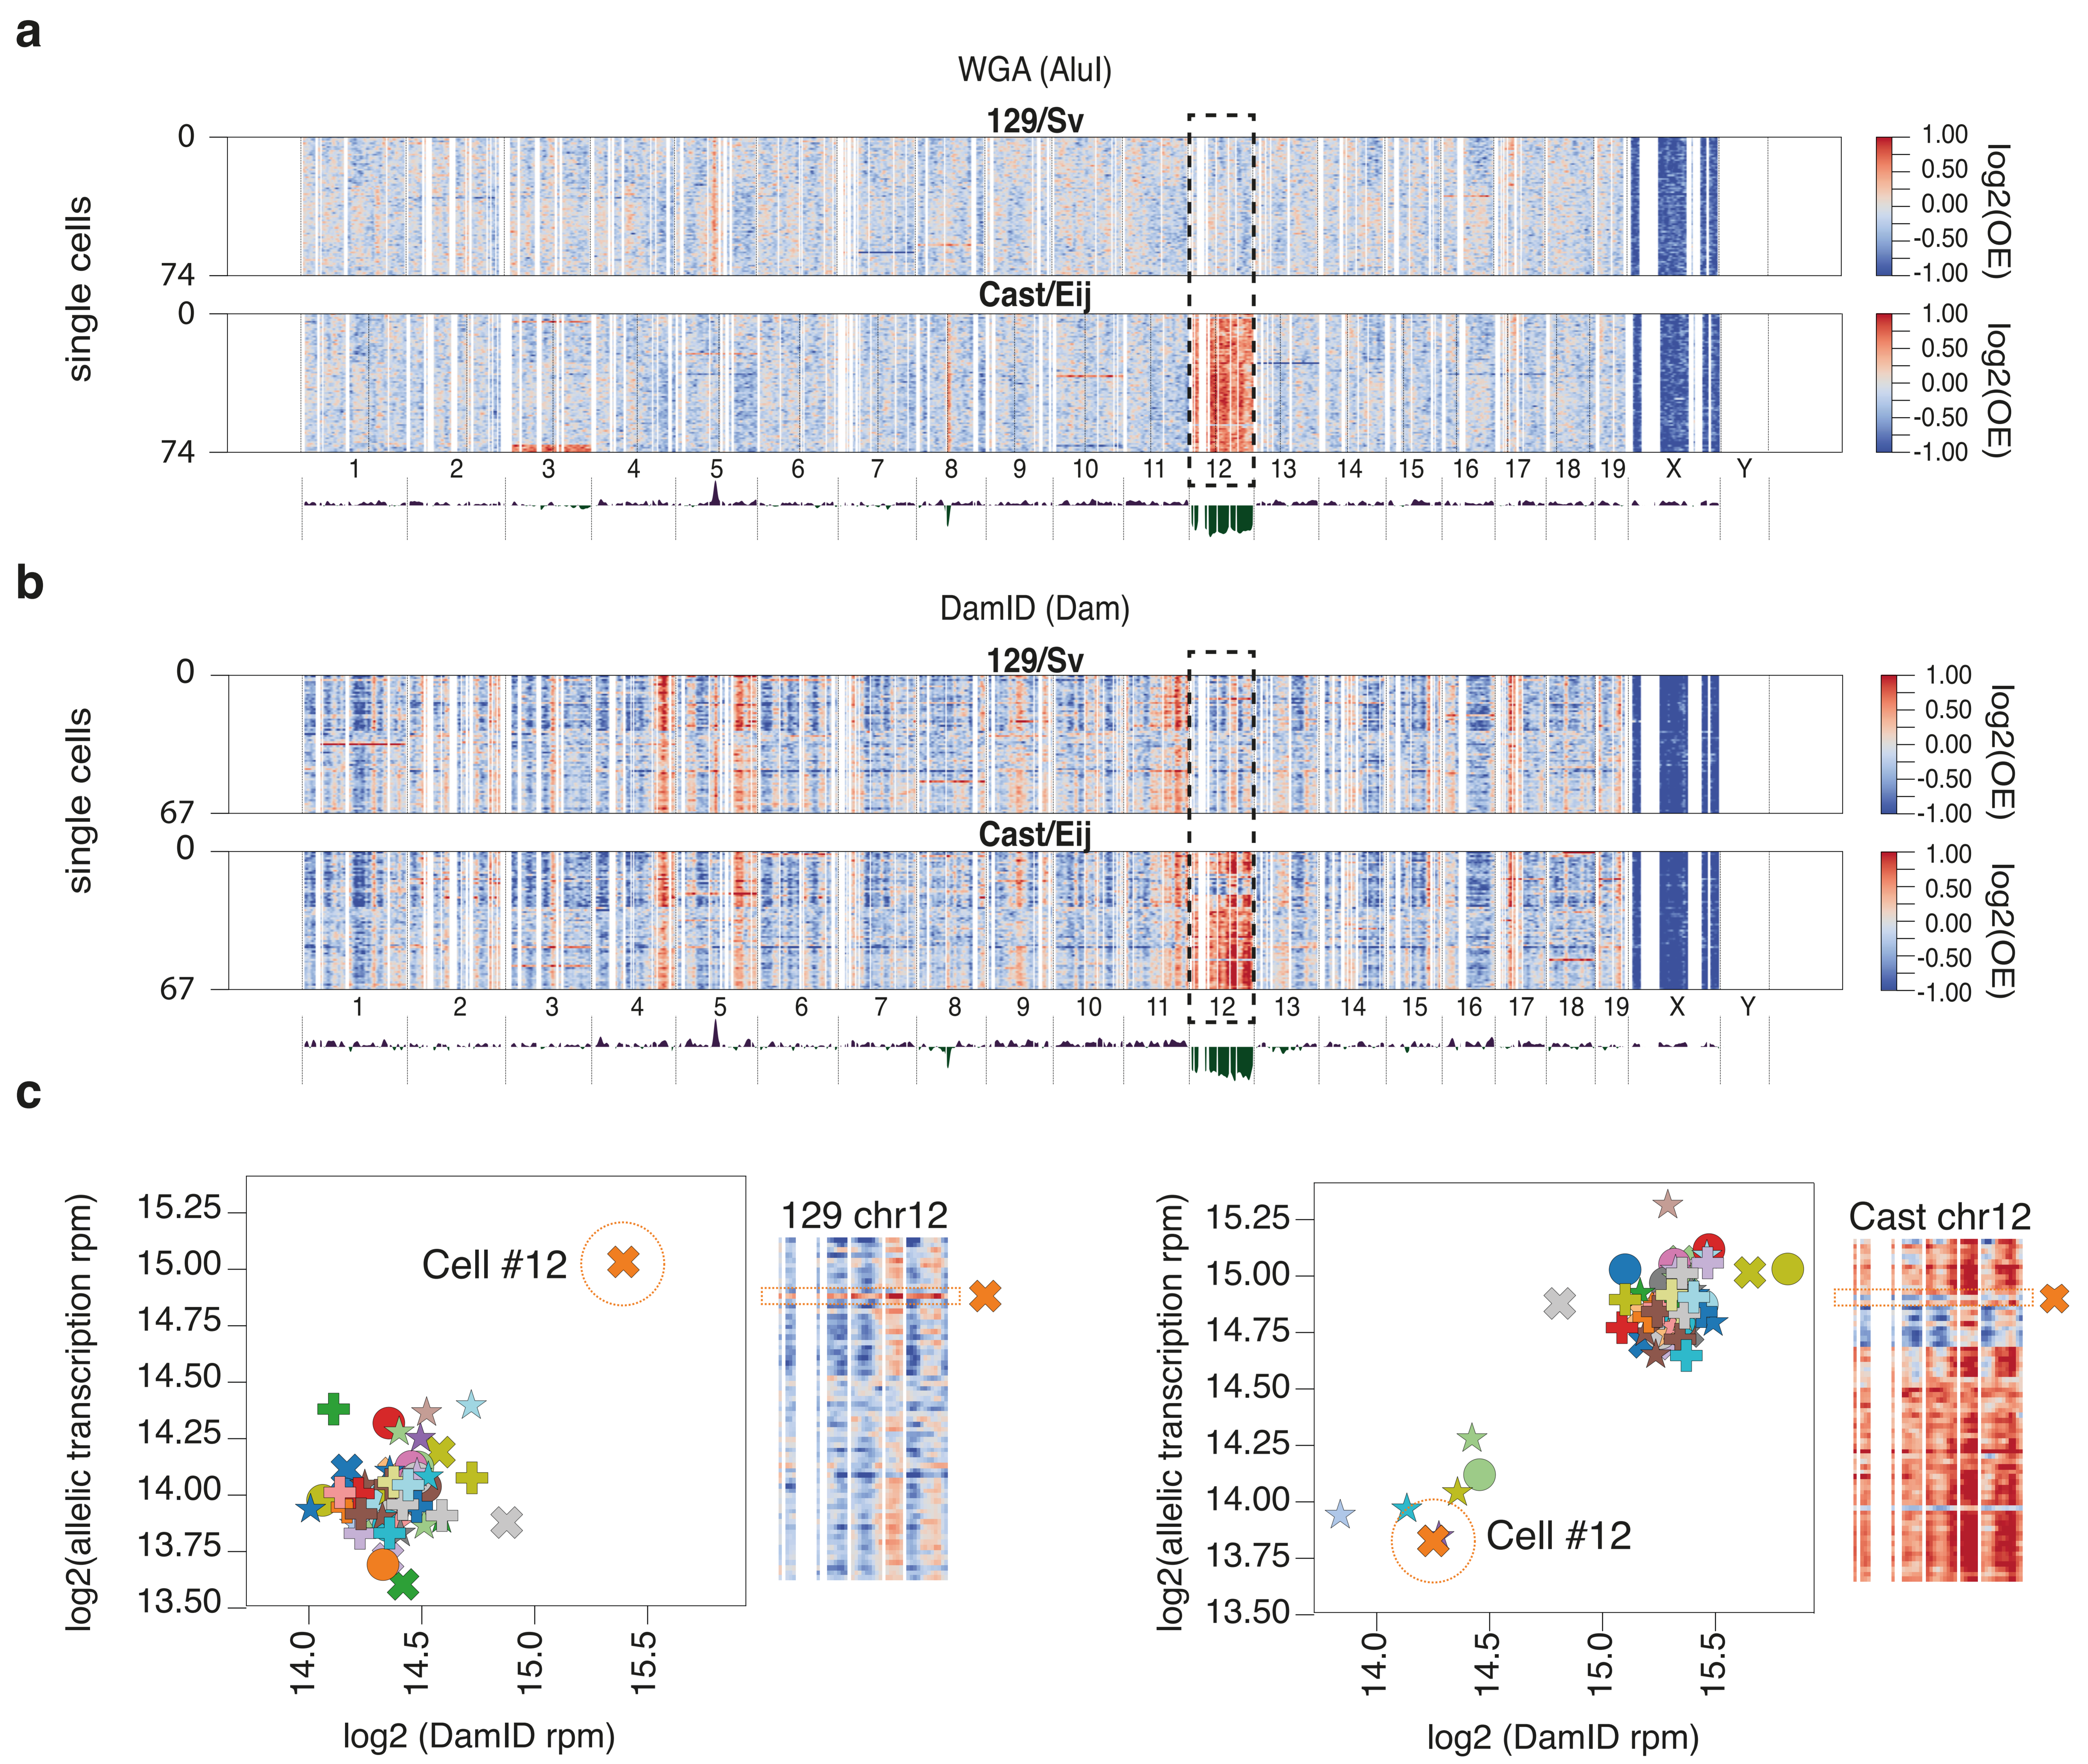

**Figure S7**

**a**

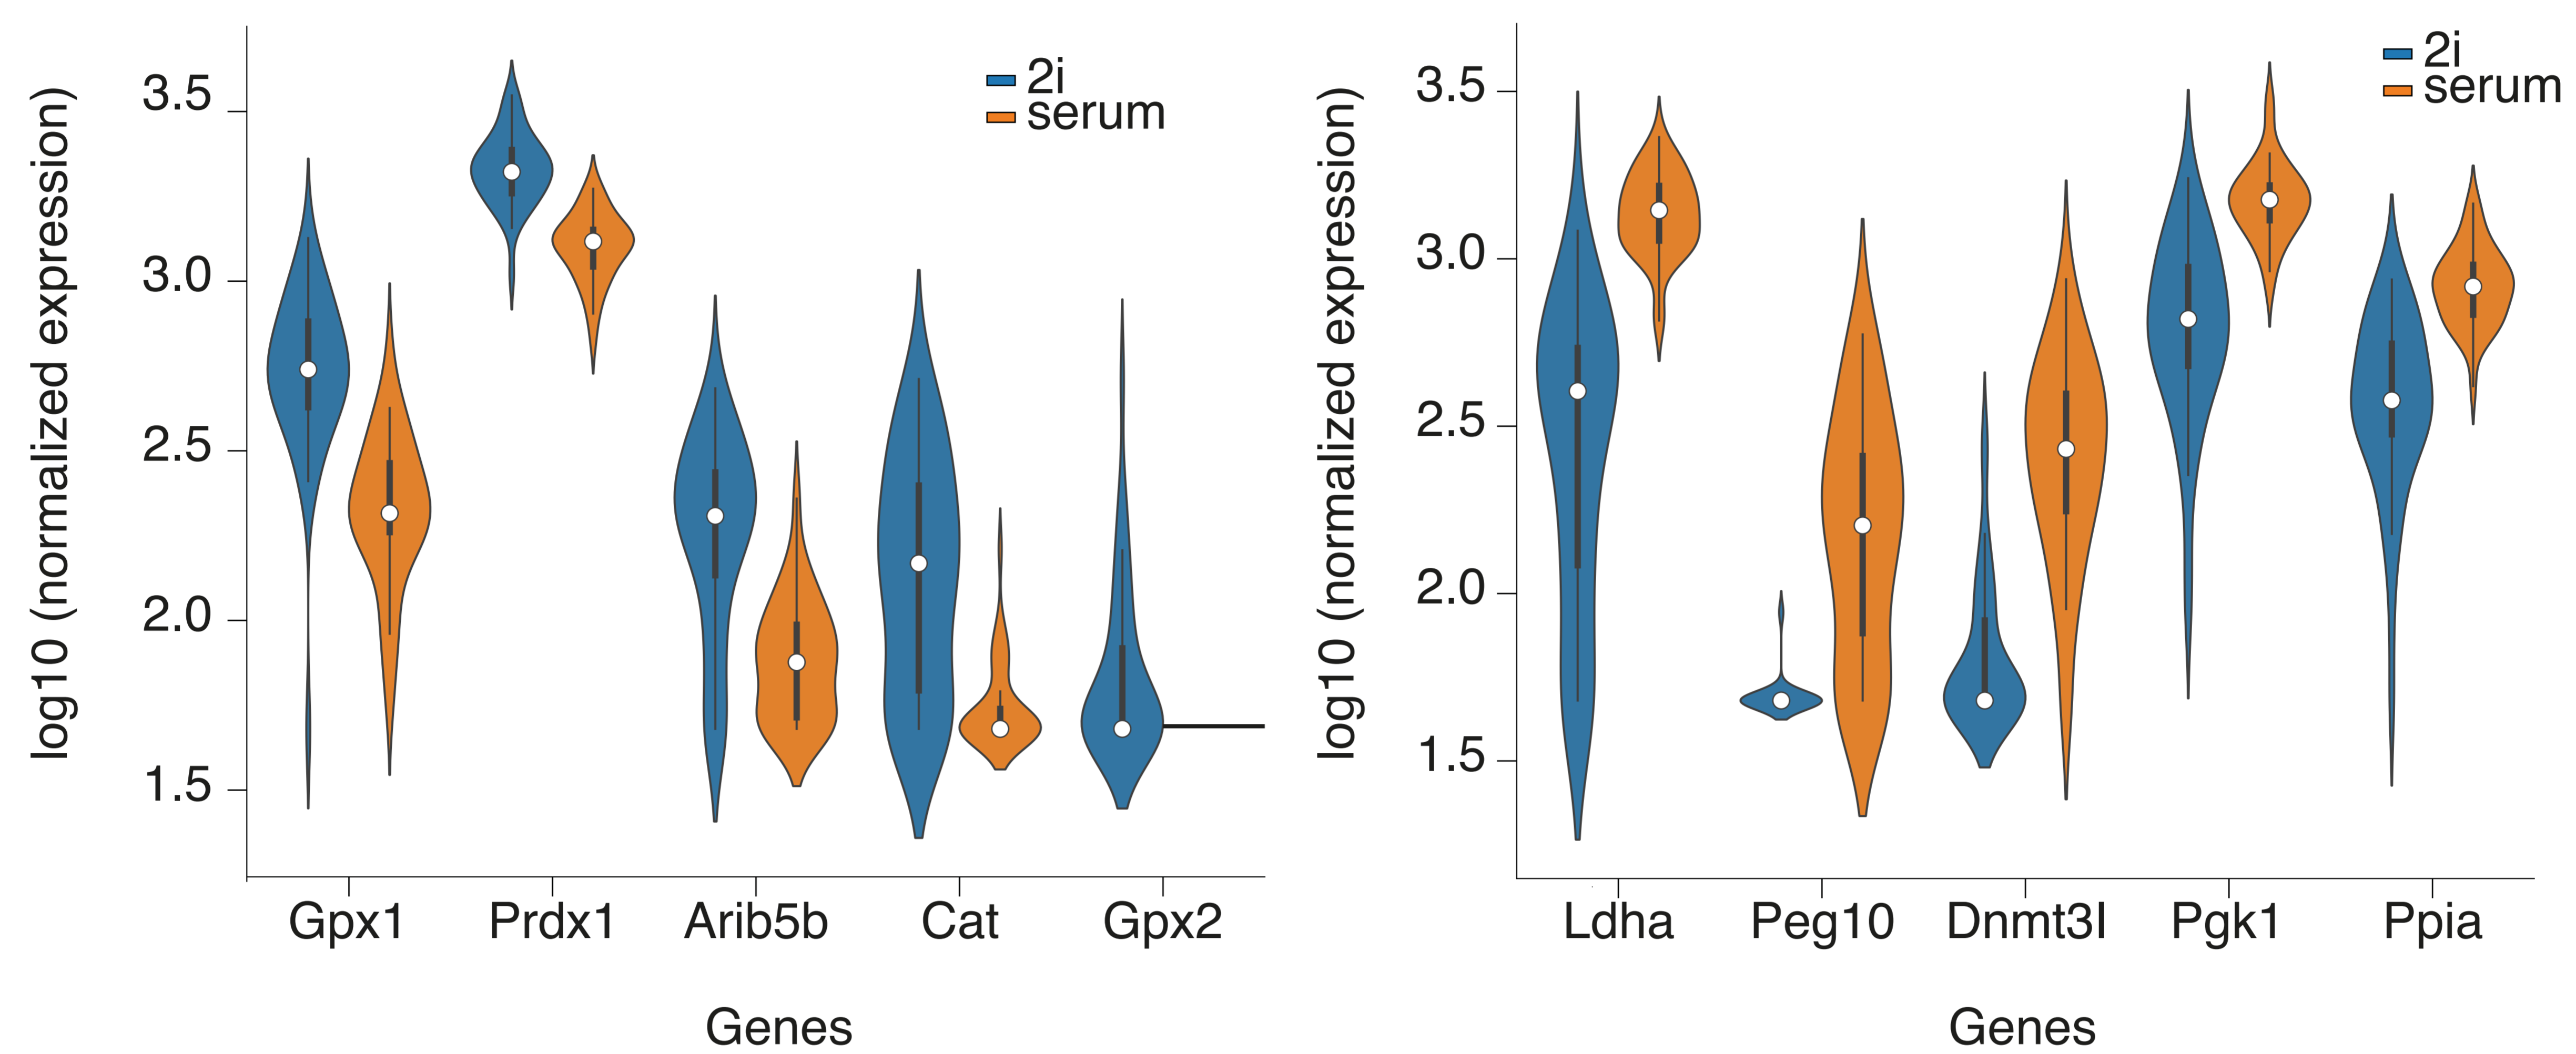

**b**

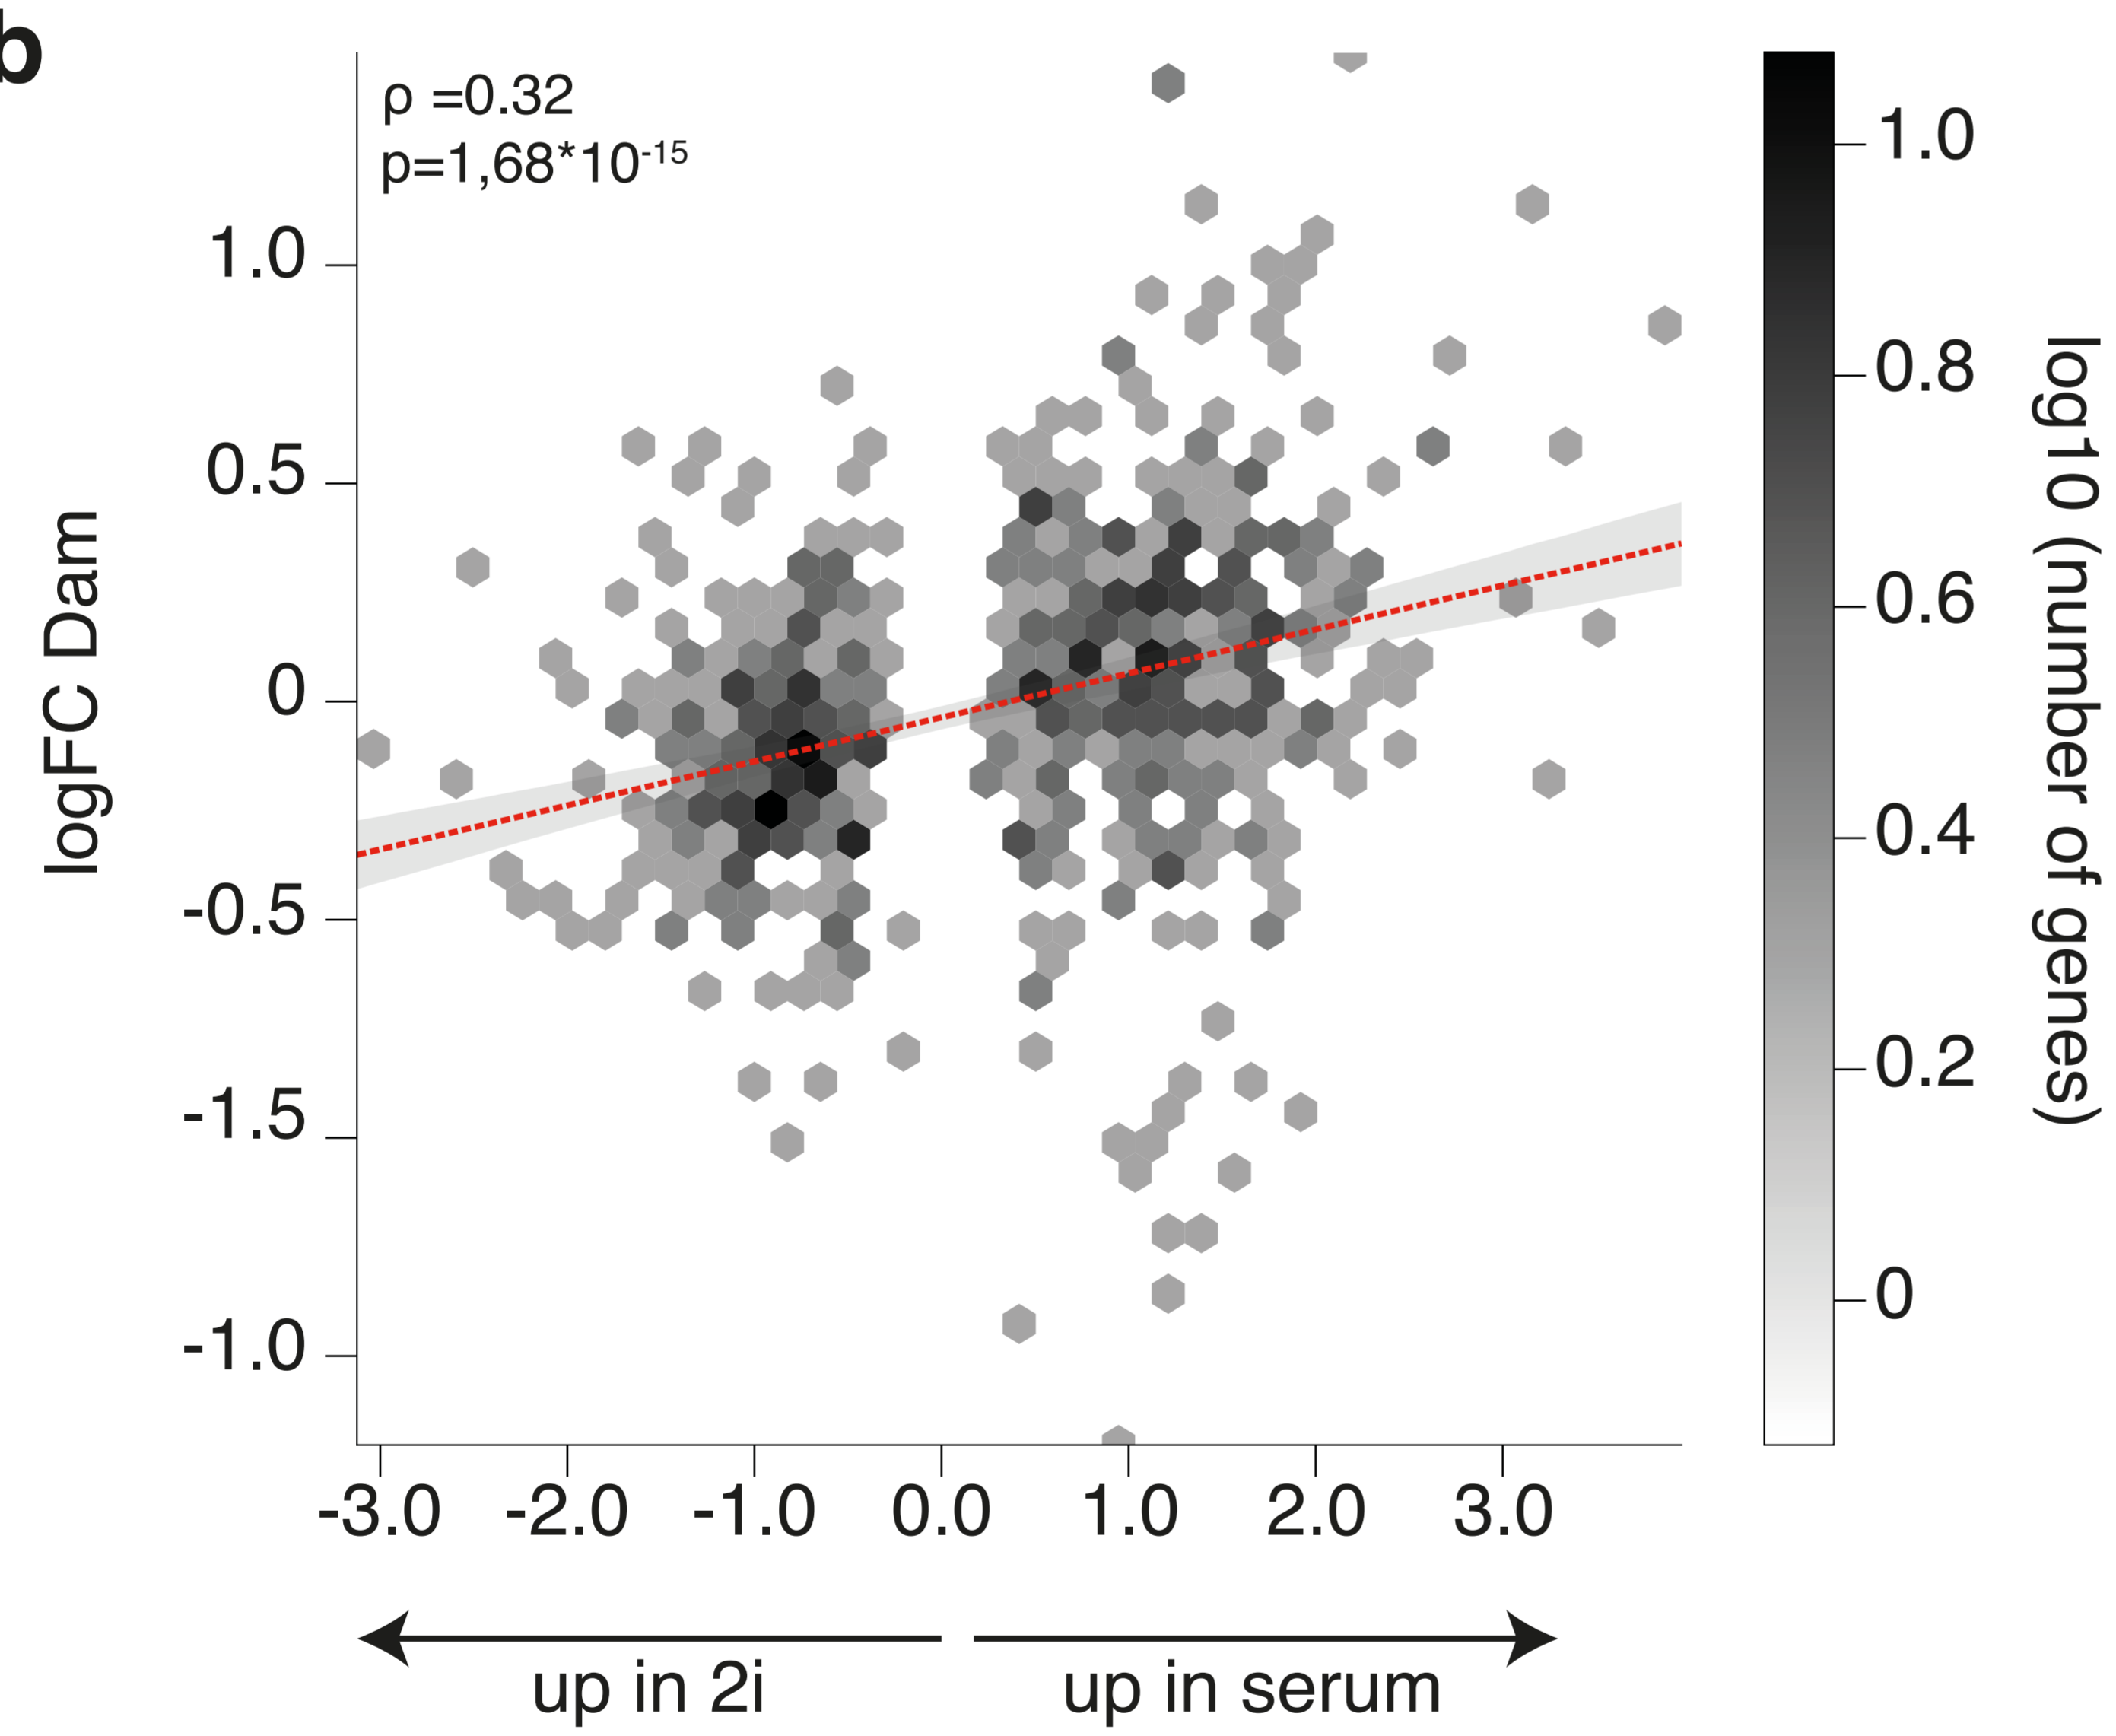

Supplement: Supplementary file [file media-1.pdf]
